# Supplementary material for: “Bottle-around-a-ship” confinement of high loadings of Acridine Orange in new aluminophosphate crystalline materials
Source: Royal Society of Chemistry journal article supplement (doi:10.1039/b600893c), 2006-01-01
Supplement: b600893c.pdf [file b600893c.pdf]

**“Bottle-around-a-ship” confinement of high loadings of acridine orange in new  
aluminophosphate crystalline materials**

Felipe Gándara,<sup>a</sup> Fernando López-Arbeloa,<sup>b</sup> Eduardo Ruiz-Hitzky<sup>a</sup> and Miguel A. Cambor<sup>a\*</sup>

<sup>a</sup>Instituto de Ciencia de Materiales de Madrid, CSIC, Campus Cantoblanco, 28049  
Madrid, Spain, Email: macambor@icmm.csic.es

<sup>b</sup>Departamento de Química Física, Universidad del País Vasco, 48080 Bilbao, Spain.

**Table 1S. Bragg reflections for Phases A and B ( $2\theta/^\circ$ ,  $\text{CuK}\alpha$  radiation)**

| Phase A | Phase B |
|---------|---------|
| 3.93    | 3.18    |
| 7.57    | 3.9*    |
| 8.63    | 6.37    |
| 9.78    | 8.00    |
| 11.40   | 9.62    |
| 11.91   | 11.90   |
| 12.92   | 12.36   |
| 14.23   | 12.85   |
| 15.34   | 13.27   |
| 15.89   | 14.39   |
| 16.44   | 15.42   |
| 17.35   | 16.75   |
| 18.85   | 18.93   |
| 19.76   | 19.51   |
| 19.98   | 19.66   |
| 21.24   | 19.97   |
| 21.59   | 20.72   |
| 22.20   | 21.13   |
| 22.65   | 21.34   |
| 23.04   | 22.18   |
| 23.48   | 22.61   |
| 24.03   | 23.25   |
| 24.57   | 23.93   |
| 25.78   | 24.78   |
| 26.04   | 25.97   |
| 27.30   | 26.55   |
| 28.07   | 28.27   |
| 28.43   | 29.10   |
| 28.91   | 30.18   |
| 29.11   | 32.52   |
| 29.61   | 33.70   |
| 30.01   | 34.59   |
| 30.38   | 37.70   |
| 30.82   | 43.01   |
| 32.25   | 43.87   |
| 32.70   |         |

\* This reflection possibly indicates the presence of a small impurity of phase A.

**Table 2S. Observed reflections for Phase C (CuK $\alpha$  radiation), with assigned Miller indices and calculated positions (space group P2 $_1$ /a, a= 32.69, b=13.61, c= 7.16Å,  $\beta$ =97.0°)**

| <b>2<math>\theta</math>/° obs.</b> | <b>index</b> | <b>2<math>\theta</math>/° calc.</b> | <b>2<math>\theta</math>/° obs.</b> | <b>index</b> | <b>2<math>\theta</math>/° calc.</b> |
|------------------------------------|--------------|-------------------------------------|------------------------------------|--------------|-------------------------------------|
| 5.43                               | 2 0 0        | 5.45                                | 19.75                              | 1 3 0        | 19.74                               |
| 7.05                               | 1 1 0        | 7.04                                | 20.39                              | -6 1 1       | 20.40                               |
| 8.47                               | 2 1 0        | 8.45                                | 21.21                              | 3 3 0        | 21.22                               |
| 10.41                              | 3 1 0        | 10.44                               | 21.84                              | 6 0 1        | 21.85                               |
| 10.90                              | 4 0 0        | 10.90                               | 22.48                              | -7 1 1       | 22.50                               |
| 12.44                              | 0 0 1        | 12.44                               | 23.22                              | 7 2 0        | 23.20                               |
| 12.68                              | 4 1 0        | 12.70                               |                                    | -1 3 1       | 23.21                               |
| 12.92                              | -2 0 1       | 12.94                               |                                    | 0 3 1        | 23.23                               |
| 14.02                              | -1 1 1       | 14.00                               | 24.72                              | -8 1 1       | 24.73                               |
|                                    | 0 1 1        | 14.04                               | 25.03                              | 0 0 2        | 25.02                               |
| 14.50                              | -2 1 1       | 14.49                               |                                    | -4 3 1       | 25.04                               |
| 14.58                              | 1 1 1        | 14.60                               | 25.20                              | 3 3 1        | 25.19                               |
| 15.10                              | 5 1 0        | 15.12                               |                                    | -7 2 1       | 25.22                               |
| 15.37                              | 3 2 0        | 15.37                               | 25.88                              | 1 1 2        | 25.88                               |
| 15.61                              | 2 1 1        | 15.63                               | 26.31                              | 2 0 2        | 26.3                                |
| 16.38                              | 6 0 0        | 16.39                               |                                    | 1 4 0        | 26.31                               |
| 16.99                              | 4 2 0        | 16.99                               | 26.62                              | 8 0 1        | 26.62                               |
| 17.58                              | 4 0 1        | 17.58                               | 27.49                              | 10 0 0       | 27.48                               |
| 18.02                              | -1 2 1       | 17.99                               |                                    | 7 3 0        | 27.49                               |
|                                    | 0 2 1        | 18.02                               | 28.00                              | 9 2 0        | 27.99                               |
| 18.45                              | 1 2 1        | 18.47                               | 28.22                              | -2 2 2       | 28.22                               |
| 18.74                              | 4 1 1        | 18.75                               |                                    | -6 0 2       | 28.24                               |
| 18.87                              | 5 2 0        | 18.88                               | 28.75                              | 1 2 2        | 28.74                               |
| 19.31                              | 2 2 1        | 19.30                               |                                    | -10 0 1      | 28.76                               |
|                                    | -6 0 1       | 19.32                               | 29.24                              | -7 3 1       | 29.23                               |
